# Supplementary material
Source: PubMed Central journal article supplement (PMC4199904)
Supplement: NIHMS625777-supplement-Supplementary_figures_and_table.pdf [file NIHMS625777-supplement-Supplementary_figures_and_table.pdf]

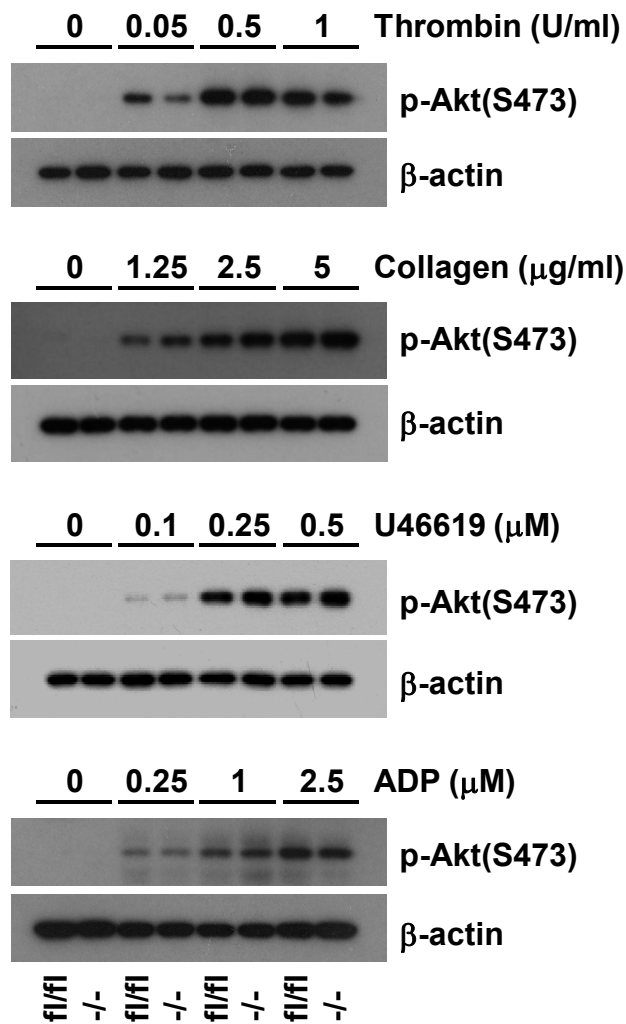

**Supplementary Figure I.** Dab2 is involved in the regulation of low concentrations thrombin-stimulated Akt-Ser473 phosphorylation. The washed platelets from *fl/fl* and *-/-* mice were stimulated by thrombin, collagen, U46619, and ADP at the indicated concentrations. The platelets lysates were analyzed by Western blot using anti-p-Akt (Ser473) antibody. The expression of β-actin was used for the control of equal protein loading. Representative blots of 3 independent experiments are shown.

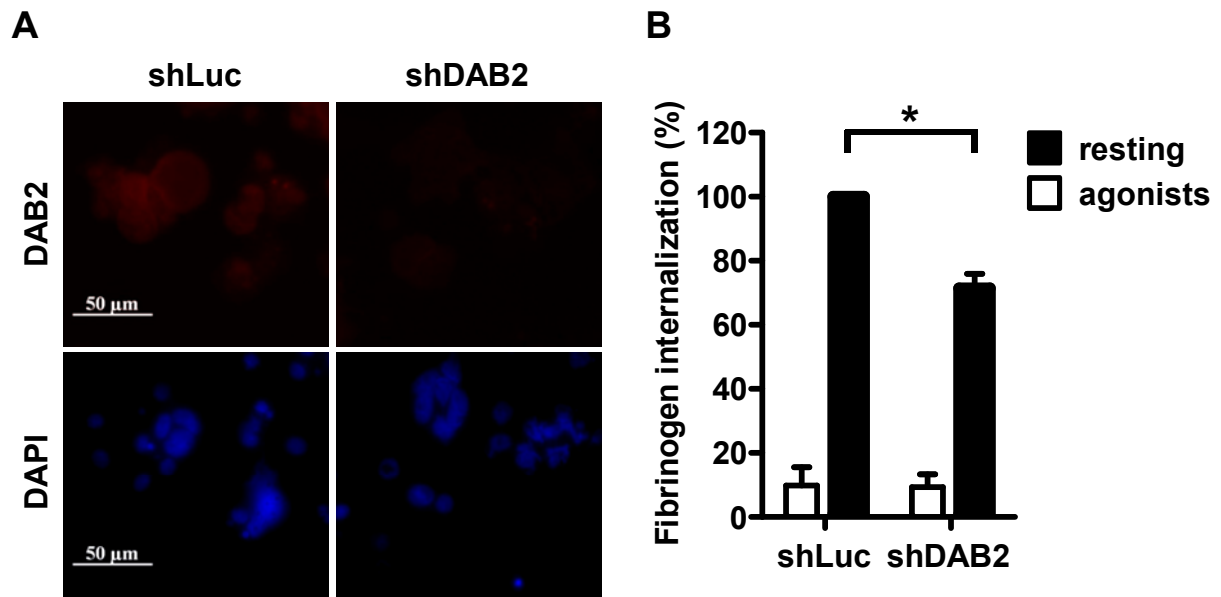

**Supplementary Figure II.** Effect of lentivirus-mediated Dab2 knockdown on rat primary megakaryocyte fibrinogen uptake. **A**, The shLuc or shDAB2 lentivirus-infected rat bone marrow cell were cultured in the presence of TPO (50 ng/ml) for 3 days. Immunofluorescence staining of Dab2 was performed using the anti-Dab2 antibody followed by the Alexa Fluor 546-conjugated, goat-anti-rabbit secondary antibody. After counterstained by 4', 6-diamidino-2-phenylindole (DAPI, blue), the fluorescent images were obtained using the fluorescent microscopy (length of bar = 50  $\mu$ m). **B**, The shLuc or shDAB2 lentivirus-infected rat bone marrow cells on day 3 of culture were sedimented by gravity. The cells were then untreated or stimulated with the agonists containing ADP (12.5  $\mu$ M)/thrombin (0.0125 U/ml)/epinephrine (12.5  $\mu$ M) in the presence of Alexa Fluor 488-fibrinogen (25  $\mu$ g/ml). After staining with propidium iodide (1 mg/ml), fibrinogen internalization was determined by flow cytometry. The amount of fibrinogen internalization in the agonists-treated control cells (shLuc) was arbitrarily set as 100%. The data represent the mean  $\pm$  SEM of 3 independent experiments. \*,  $p < 0.05$ .

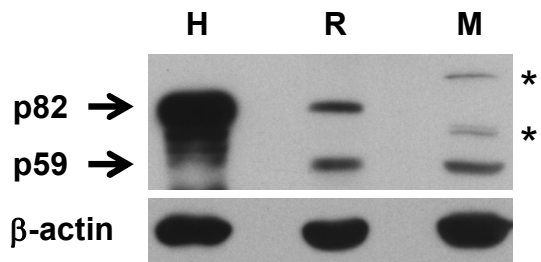

**Supplementary Figure III.** Dab2 expression in different species. The expression of Dab2 in human (H), rat (R) and mouse (M) platelets was analyzed by Western blot using anti-Dab2 antibody. The expression of  $\beta$ -actin was used for the control of equal protein loading. The data represent of 3 independent experiments. The non-specific bands (marked as \*) in the mouse platelets do not always appear in each preparation of platelet lysates.

## Supplementary Table

**Table I. The complete blood count of Dab2<sup>fl/fl</sup> and Dab2<sup>-/-</sup> mice**

| Parameters                                | Unit         | Dab2 <sup>fl/fl</sup> (n=6) | Dab2 <sup>-/-</sup> (n=8) |
|-------------------------------------------|--------------|-----------------------------|---------------------------|
| <b>Leukocytes</b>                         |              |                             |                           |
| White blood cells                         | (K/ $\mu$ L) | 8.2 $\pm$ 1.2               | 6.4 $\pm$ 0.9             |
| Neutrophils                               | (K/ $\mu$ L) | 1.2 $\pm$ 0.4               | 1.0 $\pm$ 0.3             |
| Lymphocytes                               | (K/ $\mu$ L) | 6.4 $\pm$ 0.8               | 5.2 $\pm$ 0.6             |
| Monocytes                                 | (K/ $\mu$ L) | 0.4 $\pm$ 0.1               | 0.2 $\pm$ 0.1             |
| Eosinophils                               | (K/ $\mu$ L) | 0.0 $\pm$ 0.0               | 0.0 $\pm$ 0.0             |
| Basophils                                 | (K/ $\mu$ L) | 0.0 $\pm$ 0.0               | 0.0 $\pm$ 0.0             |
| <b>Erythrocytes</b>                       |              |                             |                           |
| Red blood cells                           | (M/ $\mu$ L) | 8.7 $\pm$ 0.2               | 9.0 $\pm$ 0.4             |
| Hemoglobin                                | (g/dL)       | 11.0 $\pm$ 0.3              | 10.5 $\pm$ 0.5            |
| Hematocrit                                | (%)          | 48.3 $\pm$ 1.1              | 49.2 $\pm$ 1.1            |
| Mean corpuscular values                   | (fL)         | 55.8 $\pm$ 1.0              | 55.3 $\pm$ 1.7            |
| Mean corpuscular hemoglobin               | (pg)         | 6.4 $\pm$ 2.8               | 6.3 $\pm$ 2.3             |
| Mean corpuscular hemoglobin concentration | (g/dL)       | 11.2 $\pm$ 4.9              | 10.8 $\pm$ 3.9            |
| RBC distribution width                    | (%)          | 17.3 $\pm$ 0.6              | 19.2 $\pm$ 0.9            |
| <b>Thrombocytes</b>                       |              |                             |                           |
| Platelets                                 | (K/ $\mu$ L) | 910 $\pm$ 46                | 872 $\pm$ 40              |
| Mean platelet volume                      | (fL)         | 4.4 $\pm$ 0.1               | 4.2 $\pm$ 0.1             |

Unpaired Student's *t* test was used for all parameters analyzed. The data were presented as mean  $\pm$  standard error of the mean (SEM). None of the differences between Dab2<sup>fl/fl</sup> and Dab2<sup>-/-</sup> mice was statistically significant.
